# Supplementary material for: Correlates of physical activity and sedentary behaviour in the Thai population: a systematic review
Source: PubMed Central journal article supplement (PMC6469108; doi:10.1186/s12889-019-6708-2), 2019-04-16
Supplement: 12889_2019_6708_MOESM2_ESM.pdf [file 12889_2019_6708_MOESM2_ESM.pdf]

Supplementary Table 1: Summary of evidence on moderate-to-vigorous physical activity (MVPA) in Thai children and adolescents (6 – 17 years old)

| Correlates                                                                                                         | Relationship with PA |              |                     | Summary |
|--------------------------------------------------------------------------------------------------------------------|----------------------|--------------|---------------------|---------|
|                                                                                                                    | Negative/Inverse (-) | Positive (+) | Non-significant (?) | Code    |
| <b>Individual Level</b>                                                                                            |                      |              |                     |         |
| <i>Demographic factors</i>                                                                                         |                      |              |                     |         |
| – Age                                                                                                              | 97                   |              |                     | -       |
| – Sex (+ denotes males are more active, - denotes females are more active)                                         |                      | 97, 126, 135 |                     | +       |
| – Household income                                                                                                 | 96                   |              |                     | -       |
| – Municipality (+ denotes more PA in an urban place of residence, - denotes more PA in a rural place of residence) |                      |              | 135 (M, F)          | ?       |
| <i>Biological factors</i>                                                                                          |                      |              |                     |         |
| – Body mass index (BMI)                                                                                            | 97, 130 (M)          |              | 130 (F)             | -       |
| <i>General health</i>                                                                                              |                      |              |                     |         |
| – Child's health status as perceived by parents                                                                    |                      |              | 45                  | ?       |
| <i>Psychological, cognitive, and emotional factors</i>                                                             |                      |              |                     |         |
| – Self-efficacy                                                                                                    |                      | 45           |                     | +       |
| – Perceived benefits of PA/exercise                                                                                |                      |              | 38 (M, F)           | ?       |
| – Perceived barriers for PA/exercise                                                                               | 38 (F)               |              | 38 (M)              | ?       |
| – Cues to action                                                                                                   |                      |              | 38 (M, F)           | ?       |
| – Being bullied                                                                                                    | 129 (M)              |              | 129 (F)             | ?       |
| <i>Knowledge</i>                                                                                                   |                      |              |                     |         |
| – Parents' knowledge about school-aged children's PA                                                               |                      |              | 45                  | ?       |

(+) Mostly positive associations, (-) Mostly negative associations, (?) Mostly non-significant, indeterminate, or inconsistent associations, (M) Male, (F) Female

Supplementary Table 2: Summary of evidence on total physical activity in Thai children and adolescents (6 – 17 years old)

| Correlates                                                                                                         | Relationship with PA |                        |                     | Summary Code |
|--------------------------------------------------------------------------------------------------------------------|----------------------|------------------------|---------------------|--------------|
|                                                                                                                    | Negative/Inverse (-) | Positive (+)           | Non-significant (?) |              |
| <b>Individual Level</b>                                                                                            |                      |                        |                     |              |
| <i>Demographic factors</i>                                                                                         |                      |                        |                     |              |
| – Age                                                                                                              | 135 (M, F), 183      |                        | 158 (M, F)          | -            |
| – Sex (+ denotes males are more active, - denotes females are more active)                                         |                      | 55, 135, 158, 178, 183 | 169                 | ++           |
| – School type (+ denotes more PA in mixed-gender schools, - denotes more PA in single-gender schools)              |                      | 55                     |                     | +            |
| – Household income                                                                                                 | 178                  |                        |                     |              |
| – Municipality (+ denotes more PA in an urban place of residence, - denotes more PA in a rural place of residence) |                      | 169                    | 135 (M, F)          | ?            |
| – Household's location within Bangkok                                                                              |                      |                        | 178                 | ?            |
| <i>Biological factors</i>                                                                                          |                      |                        |                     |              |
| – Body weight                                                                                                      |                      |                        | 135 (M, F)          | ?            |
| – Body mass index (BMI)                                                                                            | 178                  |                        | 135 (M, F), 158     | ?            |
| – Parents' BMI                                                                                                     |                      |                        | 178                 | ?            |
| – Overweight                                                                                                       |                      |                        | 52                  | ?            |
| – Obesity                                                                                                          |                      |                        | 169                 | ?            |
| – Body fat (%)                                                                                                     |                      | 135 (M)                | 135 (F)             | ?            |
| – Height                                                                                                           | 135 (M, F)           |                        |                     | -            |
| – Low-density lipoprotein cholesterol (LDL-C) level                                                                |                      |                        | 158                 | ?            |
| – Systolic blood pressure                                                                                          |                      |                        | 158                 | ?            |
| – Diastolic blood pressure                                                                                         |                      |                        | 158                 | ?            |
| – Dietary fat intake                                                                                               |                      |                        | 158                 | ?            |
| <i>Psychological, cognitive, and emotional factors</i>                                                             |                      |                        |                     |              |
| – Attitudes towards PA/exercise                                                                                    |                      | 178                    |                     | +            |
| – Body dissatisfaction                                                                                             | 55                   |                        |                     | -            |
| – Enjoyment of PA/exercise                                                                                         |                      | 183                    | 178                 | ?            |

| Correlates                                                    | Relationship with PA |              |                     | Summary Code |
|---------------------------------------------------------------|----------------------|--------------|---------------------|--------------|
|                                                               | Negative/Inverse (-) | Positive (+) | Non-significant (?) |              |
| <i>Physical skills, abilities, and fitness</i>                |                      |              |                     |              |
| – Perceived physical competence                               |                      | 183          |                     | +            |
| <i>Health behavioural and lifestyle</i>                       |                      |              |                     |              |
| – TV viewing                                                  | 178                  |              |                     | -            |
| Social environment                                            |                      |              |                     |              |
| <i>Social and cultural factors</i>                            |                      |              |                     |              |
| – Social support                                              |                      | 178          |                     | +            |
| – Parent/family influences                                    |                      | 183          | 178                 | ?            |
| – Friendship/companionship influences                         |                      | 183          |                     | +            |
| Physical environment                                          |                      |              |                     |              |
| <i>Environment factors</i>                                    |                      |              |                     |              |
| – Environmental support (e.g. situational influences)         |                      | 178          |                     | +            |
| – Supportive physical environment (e.g. facilities, supplies) |                      | 178          |                     | +            |
| – Supportive neighbourhood environment                        |                      | 178          |                     | +            |

(+) Mostly positive associations, (-) Mostly negative associations, (?) Mostly non-significant, indeterminate, or inconsistent associations, (M) Male, (F) Female

Supplementary Table 3: Summary of evidence on moderate physical activity (MPA) in Thai children and adolescents (6 – 17 years old)

| Correlates                                                                 | Relationship with PA |              |                     | Summary Code |
|----------------------------------------------------------------------------|----------------------|--------------|---------------------|--------------|
|                                                                            | Negative/Inverse (-) | Positive (+) | Non-significant (?) |              |
| <b>Individual Level</b>                                                    |                      |              |                     |              |
| <i>Demographic factors</i>                                                 |                      |              |                     |              |
| - Sex (+ denotes males are more active, - denotes females are more active) |                      | 111, 118     |                     | +            |
| - School grade                                                             |                      |              | 118                 | ?            |
| <i>Biological factors</i>                                                  |                      |              |                     |              |
| - Body mass index (BMI)                                                    |                      |              | 33                  | ?            |
| - Overweight                                                               |                      | 111 (F)      | 111 (M)             | ?            |
| <i>Psychological, cognitive, and emotional factors</i>                     |                      |              |                     |              |
| - Resilience                                                               |                      | 118          |                     | +            |

(+) Mostly positive associations, (-) Mostly negative associations, (?) Mostly non-significant, indeterminate, or inconsistent associations, (M) Male, (F) Female

Supplementary Table 4: Summary of evidence on vigorous physical activity (VPA) in Thai children and adolescents (6 – 17 years old)

| Correlates                                                                 | Relationship with PA |              |                     | Summary Code |
|----------------------------------------------------------------------------|----------------------|--------------|---------------------|--------------|
|                                                                            | Negative/Inverse (-) | Positive (+) | Non-significant (?) |              |
| <b>Individual Level</b>                                                    |                      |              |                     |              |
| <i>Demographic factors</i>                                                 |                      |              |                     |              |
| - Sex (+ denotes males are more active, - denotes females are more active) |                      | 118, 122     |                     | +            |
| - School grade                                                             |                      |              | 118                 | ?            |
| <i>General health</i>                                                      |                      |              |                     |              |
| - Self-rated general health                                                |                      | 121 (M, F)   |                     | +            |
| <i>Psychological, cognitive, and emotional factors</i>                     |                      |              |                     |              |
| - Resilience                                                               |                      | 118          |                     | +            |
| <b>Social environment</b>                                                  |                      |              |                     |              |
| <i>Social and cultural factors</i>                                         |                      |              |                     |              |
| - Friendship/companionship influences                                      |                      | 122 (M, F)   |                     | +            |
| - Involvement with friends                                                 |                      | 122 (M, F)   |                     | +            |
| - Ease in making friends                                                   |                      | 122 (M, F)   |                     | +            |

(+) Mostly positive associations, (-) Mostly negative associations, (?) Mostly non-significant, indeterminate, or inconsistent associations, (M) Male, (F) Female

Supplementary Table 5: Summary of evidence on exercise in Thai children and adolescents (6 – 17 years old)

| Correlates                                                                                                         | Relationship with PA |              |                     | Summary |
|--------------------------------------------------------------------------------------------------------------------|----------------------|--------------|---------------------|---------|
|                                                                                                                    | Negative/Inverse (-) | Positive (+) | Non-significant (?) | Code    |
| <b>Individual Level</b>                                                                                            |                      |              |                     |         |
| <i>Demographic factors</i>                                                                                         |                      |              |                     |         |
| – Sex (+ denotes males are more active, - denotes females are more active)                                         |                      | 51, 167      | 189                 | +       |
| – School grade                                                                                                     | 80                   |              | 51, 167, 189        | ?       |
| – Parents' occupation                                                                                              |                      |              | 189                 | ?       |
| – Municipality (+ denotes more PA in an urban place of residence, - denotes more PA in a rural place of residence) |                      |              | 64                  | ?       |
| <i>Biological factors</i>                                                                                          |                      |              |                     |         |
| – Body mass index (BMI)                                                                                            |                      |              | 51                  | ?       |
| – Underweight                                                                                                      |                      |              | 110                 | ?       |
| – Overweight                                                                                                       | 110, 157             |              | 125 (F)             | -       |
| – Obesity                                                                                                          | 110, 157             |              | 125 (F)             | -       |
| – Height                                                                                                           |                      |              | 80 (M, F)           | ?       |
| <i>Physical health</i>                                                                                             |                      |              |                     |         |
| – Asthma                                                                                                           | 157                  |              |                     | -       |
| – Hypertension                                                                                                     | 157                  |              |                     | -       |
| <i>Psychological, cognitive, and emotional factors</i>                                                             |                      |              |                     |         |
| – Self-efficacy                                                                                                    |                      | 51, 80, 123  | 167                 | +       |
| – Perceived benefits of PA/exercise                                                                                |                      | 48, 77       | 167                 | +       |
| – Perceived barriers for PA/exercise                                                                               | 51, 80, 123          |              | 167                 | -       |
| – Attitudes towards PA/exercise                                                                                    |                      |              | 167                 | ?       |
| – Self-esteem                                                                                                      |                      |              | 167                 | ?       |
| – Expected outcomes of PA/exercise                                                                                 |                      |              | 167                 | ?       |
| – Enjoyment of PA/exercise                                                                                         |                      | 80           |                     | +       |
| <i>Health behavioural and lifestyle</i>                                                                            |                      |              |                     |         |

| Correlates                                                    | Relationship with PA |              |                     | Summary Code |
|---------------------------------------------------------------|----------------------|--------------|---------------------|--------------|
|                                                               | Negative/Inverse (-) | Positive (+) | Non-significant (?) |              |
| – Past PA/exercise experience                                 |                      | 51, 80       | 167                 | +            |
| <i>Knowledge</i>                                              |                      |              |                     |              |
| – Knowledge about PA/exercise                                 |                      | 167          |                     | +            |
| <i>Academic/school performance</i>                            |                      |              |                     |              |
| – Grade point average                                         | 157                  |              |                     | -            |
| <b>Social environment</b>                                     |                      |              |                     |              |
| <i>Social and cultural factors</i>                            |                      |              |                     |              |
| – Social support                                              |                      | 123          | 167                 | ?            |
| – Parent/family influences                                    |                      | 80           |                     | +            |
| – Friendship/companionship influences                         |                      | 80           |                     | +            |
| – Teacher influences                                          |                      | 80           |                     | +            |
| – General interpersonal influences                            |                      | 51           |                     | +            |
| – Information support (e.g. social media)                     |                      | 167          |                     | +            |
| <b>Physical environment</b>                                   |                      |              |                     |              |
| <i>Environment factors</i>                                    |                      |              |                     |              |
| – Environmental support (e.g. situational influences)         |                      | 51, 80       |                     | +            |
| – Supportive physical environment (e.g. facilities, supplies) |                      |              | 167                 | ?            |

(+) Mostly positive associations, (-) Mostly negative associations, (?) Mostly non-significant, indeterminate, or inconsistent associations, (M) Male, (F) Female

Supplementary Table 6: Summary of evidence on moderate-to-vigorous physical activity (MVPA) in Thai adults (18 – 59 years old)

| Correlates                                                                                                                                            | Relationship with PA |                                  |                        | Summary |
|-------------------------------------------------------------------------------------------------------------------------------------------------------|----------------------|----------------------------------|------------------------|---------|
|                                                                                                                                                       | Negative/Inverse (-) | Positive (+)                     | Non-significant (?)    | Code    |
| <b>Individual Level</b>                                                                                                                               |                      |                                  |                        |         |
| <i>Demographic factors</i>                                                                                                                            |                      |                                  |                        |         |
| – Age                                                                                                                                                 |                      |                                  | 116                    | ?       |
| – Sex (+ denotes males are more active, - denotes females are more active)                                                                            |                      | 31, 116, 131, 132, 136, 180, 181 |                        | ++      |
| – Marital status (+denotes singles are more active)                                                                                                   |                      |                                  | 101                    | ?       |
| – Education level                                                                                                                                     | 116                  |                                  | 101                    | ?       |
| – Household income                                                                                                                                    |                      |                                  | 101                    | ?       |
| – Occupation (+denotes unemployed are more active)                                                                                                    |                      |                                  | 101                    | ?       |
| – Early-life (0-5) urban exposure                                                                                                                     |                      |                                  | 35                     | ?       |
| – Number of family members                                                                                                                            |                      |                                  | 101                    | ?       |
| – Student residency (+ denotes residents of university dorms are more active, - denotes students living in other accommodation types are more active) |                      |                                  | 181                    | ?       |
| <i>Biological factors</i>                                                                                                                             |                      |                                  |                        |         |
| – Body mass index (BMI)                                                                                                                               |                      | 180                              | 181                    | ?       |
| – Underweight                                                                                                                                         |                      | 131 (F)                          | 131 (M)                | ?       |
| – Overweight                                                                                                                                          |                      |                                  | 131 (M, F), 146 (M, F) | ??      |
| – Obesity                                                                                                                                             |                      |                                  | 128, 131 (M, F)        | ?       |
| – Total cholesterol (TCH) level                                                                                                                       |                      |                                  | 60 (M, F)              | ?       |
| – Triglyceride (TG) level                                                                                                                             | 60 (M, F)            |                                  |                        | -       |
| – HDL-Cholesterol level                                                                                                                               |                      | 60 (M, F)                        |                        | +       |
| – Total cholesterol: HDL-C ratio                                                                                                                      | 60 (M, F)            |                                  |                        | -       |
| – High TCH                                                                                                                                            |                      |                                  | 60 (M, F)              | ?       |
| – High TG                                                                                                                                             | 60 (M, F)            |                                  |                        | -       |
| – Low HDL-C                                                                                                                                           |                      |                                  | 60 (M, F)              | ?       |
| – High TCH: HDL-C ratio                                                                                                                               |                      |                                  | 60 (M, F)              | ?       |



| Correlates                                                                                | Relationship with PA |              |                     | Summary |
|-------------------------------------------------------------------------------------------|----------------------|--------------|---------------------|---------|
|                                                                                           | Negative/Inverse (-) | Positive (+) | Non-significant (?) | Code    |
| – Resting heart rate                                                                      | 166 (M, F)           |              |                     | -       |
| – Mean heart rate                                                                         |                      |              | 166 (M, F)          | ?       |
| – Predicted maximum heart rate (%)                                                        |                      |              | 166 (M, F)          | ?       |
| – Systolic blood pressure                                                                 |                      |              | 166 (M, F)          | ?       |
| – Diastolic blood pressure                                                                |                      |              | 166 (M, F)          | ?       |
| – VO <sub>2</sub> max                                                                     |                      | 166 (M, F)   |                     | +       |
| – FEV1 (Abnormal lung function)                                                           |                      |              | 166 (M, F)          | ?       |
| – FVC (Pulmonary function test)                                                           |                      |              | 166 (M, F)          | ?       |
| – FEV1/FVC (%)                                                                            |                      |              | 166 (M, F)          | ?       |
| <i>Physical health</i>                                                                    |                      |              |                     |         |
| – History of sickness/Underlying illness/Co-morbid diseases (+ denotes yes, - denotes no) |                      |              | 101, 181            | ?       |
| – Metabolic syndrome                                                                      |                      |              | 136 (M, F)          | ?       |
| – Musculoskeletal symptoms                                                                |                      |              | 89                  | ?       |
| – Relative appendicular skeletal muscle mass (RASM)                                       |                      | 105 (F)      | 105 (M)             | ?       |
| <i>Psychological, cognitive, and emotional factors</i>                                    |                      |              |                     |         |
| – Self-efficacy                                                                           |                      |              | 101                 | ?       |
| – Perceived benefits of PA/exercise                                                       |                      | 101          |                     | +       |
| – Perceived barriers for PA/exercise                                                      |                      |              | 101                 | ?       |
| – Sense of coherence                                                                      |                      |              | 108                 | ?       |
| – Identity achievement                                                                    |                      |              | 108                 | ?       |
| <i>Physical skills, abilities, and fitness</i>                                            |                      |              |                     |         |
| – Physical and functional fitness (e.g. walking distance, leg strength)                   |                      | 166 (M, F)   |                     | +       |
| <i>Health behavioural and lifestyle</i>                                                   |                      |              |                     |         |
| – Smoking                                                                                 |                      |              | 78 (M, F), 153      | ?       |
| – Sedentary time                                                                          |                      |              | 127                 | ?       |
| – Monosodium glutamate (MSG) intake                                                       |                      |              | 71                  | ?       |

| Correlates                                                    | Relationship with PA |              |                     | Summary Code |
|---------------------------------------------------------------|----------------------|--------------|---------------------|--------------|
|                                                               | Negative/Inverse (-) | Positive (+) | Non-significant (?) |              |
| <i>Knowledge</i>                                              |                      |              |                     |              |
| – Knowledge about PA/exercise                                 |                      | 101          |                     | +            |
| <i>Social environment</i>                                     |                      |              |                     |              |
| <i>Social and cultural factors</i>                            |                      |              |                     |              |
| – Social support                                              |                      |              | 101                 | ?            |
| – Cultural support                                            |                      | 180          |                     | +            |
| <i>Physical environment</i>                                   |                      |              |                     |              |
| <i>Environment factors</i>                                    |                      |              |                     |              |
| – Supportive physical environment (e.g. facilities, supplies) |                      |              | 101                 | ?            |
| – Urban environment                                           | 35                   |              |                     | -            |

(+) Mostly positive associations, (-) Mostly negative associations, (?) Mostly non-significant, indeterminate, or inconsistent associations, (M) Male, (F) Female

Supplementary Table 7: Summary of evidence on total physical activity in Thai adults (18 – 59 years old)

| Correlates                                                                   | Relationship with PA |              |                     | Summary Code |
|------------------------------------------------------------------------------|----------------------|--------------|---------------------|--------------|
|                                                                              | Negative/Inverse (-) | Positive (+) | Non-significant (?) |              |
| <b>Individual Level</b>                                                      |                      |              |                     |              |
| <i>Biological factors</i>                                                    |                      |              |                     |              |
| – Body mass index (BMI)                                                      |                      |              | 109                 | ?            |
| – Overweight                                                                 |                      |              | 114                 | ?            |
| – Obesity                                                                    | 86, 114              |              |                     | -            |
| – Body fat (%)                                                               |                      |              | 109                 | ?            |
| – Bone mineral density (BMD)                                                 |                      | 138          |                     | +            |
| – Dietary calcium intake                                                     |                      | 138          |                     | +            |
| – Sunlight exposure                                                          |                      | 138          |                     | +            |
| <i>Physical health</i>                                                       |                      |              |                     |              |
| – Osteoporosis                                                               |                      | 138          |                     | +            |
| <i>Psychological, cognitive, and emotional factors</i>                       |                      |              |                     |              |
| – Attitudes towards PA/exercise                                              |                      | 154          |                     | +            |
| <i>Knowledge</i>                                                             |                      |              |                     |              |
| – Knowledge about PA                                                         | 154                  |              |                     | -            |
| <b>Social environment</b>                                                    |                      |              |                     |              |
| <i>Social and cultural factors</i>                                           |                      |              |                     |              |
| – Social support                                                             |                      | 154          |                     | +            |
| – General interpersonal influences                                           |                      | 154          |                     | +            |
| – Information support (e.g. from media)                                      |                      | 154          |                     | +            |
| <b>Physical environment</b>                                                  |                      |              |                     |              |
| <i>Environment factors</i>                                                   |                      |              |                     |              |
| – Supportive physical environment (e.g. facilities, supplies)                |                      | 154          |                     | +            |
| – Month of the year (+ denotes higher PA in later months of a calendar year) |                      | 109          |                     | +            |
| <b>Policy</b>                                                                |                      |              |                     |              |
| <i>Policy attributes</i>                                                     |                      |              |                     |              |

| Correlates                      | Relationship with PA |              |                     | Summary Code |
|---------------------------------|----------------------|--------------|---------------------|--------------|
|                                 | Negative/Inverse (-) | Positive (+) | Non-significant (?) |              |
| - Supportive education policies |                      | 154          |                     | +            |

(+) Mostly positive associations, (-) Mostly negative associations, (?) Mostly non-significant, indeterminate, or inconsistent associations, (M) Male, (F) Female

Supplementary Table 8: Summary of evidence on vigorous physical activity (VPA) in Thai adults (18 – 59 years old)

| Correlates                                                                          | Relationship with PA |              |                     | Summary Code |
|-------------------------------------------------------------------------------------|----------------------|--------------|---------------------|--------------|
|                                                                                     | Negative/Inverse (-) | Positive (+) | Non-significant (?) |              |
| <b>Individual Level</b>                                                             |                      |              |                     |              |
| <i>Demographic factors</i>                                                          |                      |              |                     |              |
| - Sex (+ denotes males are more active, - denotes females are more active)          |                      | 184          |                     | +            |
| <b>Social environment</b>                                                           |                      |              |                     |              |
| <i>Social and cultural factors</i>                                                  |                      |              |                     |              |
| - Religion (+ denotes Buddhists are more active, - denotes Muslims are more active) |                      | 184          |                     | +            |

(+) Mostly positive associations, (-) Mostly negative associations, (?) Mostly non-significant, indeterminate, or inconsistent associations, (M) Male, (F) Female

Supplementary Table 9: Summary of evidence on exercise in Thai adults (18 – 59 years old)

| Correlates                                                                                                                                            | Relationship with PA |                                                               |                                                           | Summary Code |
|-------------------------------------------------------------------------------------------------------------------------------------------------------|----------------------|---------------------------------------------------------------|-----------------------------------------------------------|--------------|
|                                                                                                                                                       | Negative/Inverse (-) | Positive (+)                                                  | Non-significant (?)                                       |              |
| <b>Individual Level</b>                                                                                                                               |                      |                                                               |                                                           |              |
| <i>Demographic factors</i>                                                                                                                            |                      |                                                               |                                                           |              |
| – Age                                                                                                                                                 |                      | 37, 59, 107, 124, 140, 172                                    | 72, 81, 112, 117, 155, 176, 190, 197                      | ??           |
| – Sex (+ denotes males are more active, - denotes females are more active)                                                                            | 50, 100, 155, 196    | 83, 87, 100, 107, 113, 117, 150, 159, 165, 186, 190, 193, 195 | 36, 44, 59, 72, 92, 95, 112, 124, 140, 172, 176, 194, 197 | ??           |
| – Marital status (+denotes singles are more active)                                                                                                   |                      | 155                                                           | 59, 72, 81, 112, 117, 172, 190, 197                       | ??           |
| – Education level                                                                                                                                     | 117                  | 59, 155, 190                                                  | 72, 112, 172, 197                                         | ??           |
| – University year                                                                                                                                     | 165                  | 137, 186                                                      | 36, 95, 179, 193, 195                                     | ??           |
| – Faculty*                                                                                                                                            |                      | 44, 87, 165, 194, 195, 196                                    | 92, 95, 159, 179, 186                                     | ??           |
| – Household income                                                                                                                                    | 117                  | 92                                                            | 59, 72, 172, 179, 190, 195, 197                           | ??           |
| – Occupation (+denotes unemployed are more active)                                                                                                    |                      | 155, 190                                                      | 59, 117                                                   | ?            |
| – Region (+denotes Central including Bangkok residents are more active, - denotes residents of other provinces are more active)                       | 134                  | 155                                                           | 172                                                       | ?            |
| – Student residency (+ denotes residents of university dorms are more active, - denotes students living in other accommodation types are more active) |                      | 195                                                           | 95                                                        | ?            |
| – Hometown (urban/rural)                                                                                                                              |                      |                                                               | 92                                                        | ?            |
| – Campus/working location*                                                                                                                            |                      | 163, 197                                                      | 44, 112, 159, 194                                         | ??           |
| – Having a dependant                                                                                                                                  |                      |                                                               | 81                                                        | ?            |
| – Years of working experience                                                                                                                         |                      | 172                                                           |                                                           | +            |
| – Working position                                                                                                                                    |                      |                                                               | 112, 172, 197                                             | ?            |
| – Working type                                                                                                                                        |                      |                                                               | 197                                                       | ?            |

| Correlates                                                                                | Relationship with PA      |              |                     | Summary Code |
|-------------------------------------------------------------------------------------------|---------------------------|--------------|---------------------|--------------|
|                                                                                           | Negative/Inverse (-)      | Positive (+) | Non-significant (?) |              |
| - Duration of health club membership                                                      |                           |              | 117                 | ?            |
| - Having a 'dream job'                                                                    |                           | 92           |                     | +            |
| - Extra job (+ denotes yes, - denotes no)                                                 |                           |              | 112                 | ?            |
| - Ever attended a workshop on exercise (+ denotes yes, - denotes no)                      |                           | 124          |                     | +            |
| <i>Biological factors</i>                                                                 |                           |              |                     |              |
| - Body mass index (BMI)                                                                   | 179                       |              | 197                 | ?            |
| - Underweight                                                                             |                           | 150          |                     | +            |
| - Overweight                                                                              | 150                       |              | 65 (M, F)           | ?            |
| - Obesity                                                                                 | 46 (M, F), 47 (M, F), 150 |              | 65 (M, F)           | --           |
| - Waist circumference                                                                     |                           |              | 197                 | ?            |
| - Bone mineral density (BMD)                                                              |                           | 134          | 74, 90, 145         | ?            |
| - Skeletal muscle mass percent                                                            |                           |              | 143                 | ?            |
| - Adequate serum vitamin D levels                                                         |                           |              | 143                 | ?            |
| - Total cholesterol (TCH) level                                                           |                           |              | 107                 | ?            |
| - Triglyceride (TG) level                                                                 | 107                       |              |                     | -            |
| - HDL-Cholesterol level                                                                   |                           | 107          |                     | +            |
| - LDL-Cholesterol level                                                                   |                           |              | 107                 | ?            |
| - Resting heart rate                                                                      | 107                       |              |                     | -            |
| - Systolic blood pressure                                                                 |                           |              | 107                 | ?            |
| - Diastolic blood pressure                                                                |                           |              | 107                 | ?            |
| - Fasting plasma glucose                                                                  |                           |              | 107                 | ?            |
| - Hematocrit level                                                                        | 73                        |              |                     | -            |
| - Hypercholesterolemia                                                                    |                           |              | 103 (M, F)          | ?            |
| <i>Physical health</i>                                                                    |                           |              |                     |              |
| - History of sickness/Underlying illness/Co-morbid diseases (+ denotes yes, - denotes no) |                           |              | 59, 112, 195, 197   | ??           |
| - Hypertension                                                                            |                           |              | 69                  | ?            |

| Correlates                                             | Relationship with PA                   |                                                |                     | Summary |
|--------------------------------------------------------|----------------------------------------|------------------------------------------------|---------------------|---------|
|                                                        | Negative/Inverse (-)                   | Positive (+)                                   | Non-significant (?) | Code    |
| - Musculoskeletal symptoms                             | 63, 144                                |                                                | 85, 133             | ?       |
| - Dysmenorrhea                                         |                                        |                                                | 57 (F)              | ?       |
| - Age-related macular degeneration (AMD)               | 88                                     |                                                |                     | -       |
| <i>General health</i>                                  |                                        |                                                |                     |         |
| - Self-rated general health                            |                                        | 87, 94, 175, 194, 197                          | 159                 | ++      |
| <i>Psychological, cognitive, and emotional factors</i> |                                        |                                                |                     |         |
| - Mental health                                        |                                        | 32, 94, 175, 190                               |                     | ++      |
| - Attitudes towards PA/exercise                        |                                        | 49, 50 (M, F), 117, 165,<br>186, 188, 190, 197 | 44, 70, 82, 112     | ++      |
| - Overall health belief                                |                                        | 170                                            |                     | +       |
| - Self-efficacy                                        |                                        | 81, 83, 87, 140, 159, 172,<br>194              | 72, 137             | ++      |
| - Perceived benefits of PA/exercise                    |                                        | 50 (M, F), 83, 87, 137,<br>172, 175, 194       | 59, 72, 159, 170    | ++      |
| - Perceived barriers for PA/exercise                   | 72, 83, 87, 159, 170, 172,<br>175, 194 |                                                | 62                  | --      |
| - Outcome expectancies                                 |                                        | 81, 140                                        |                     | +       |
| - Intention to PA/exercise                             |                                        | 140, 179                                       |                     | +       |
| - Enjoyment of PA/exercise                             |                                        | 59                                             |                     | +       |
| - Perceived exercise-related effect                    | 140                                    |                                                | 72, 170             | ?       |
| - Career satisfaction                                  |                                        | 182                                            |                     | +       |
| - Motivation for PA/exercise                           |                                        | 83                                             | 76, 195             | ?       |
| - External regulation                                  |                                        |                                                | 76                  | ?       |
| - Extrinsic motivation                                 | 76                                     |                                                |                     | -       |
| - Intrinsic motivation                                 |                                        | 76                                             |                     | +       |
| - Commitment to PA/exercise                            |                                        |                                                | 151                 | ?       |
| - Stress level                                         | 179                                    |                                                |                     | -       |



| Correlates                                                              | Relationship with PA |                                   |                                     | Summary Code |
|-------------------------------------------------------------------------|----------------------|-----------------------------------|-------------------------------------|--------------|
|                                                                         | Negative/Inverse (-) | Positive (+)                      | Non-significant (?)                 |              |
| – Score on memory and intelligence tests                                |                      |                                   | 32                                  | ?            |
| <i>Physical skills, abilities, and fitness</i>                          |                      |                                   |                                     |              |
| – Physical and functional fitness (e.g. walking distance, leg strength) |                      | 94                                |                                     | +            |
| <i>Health behavioural and lifestyle</i>                                 |                      |                                   |                                     |              |
| – Alcohol consumption                                                   |                      | 177 (M)                           | 177 (F)                             | ?            |
| – Healthy dietary habits                                                |                      | 119                               |                                     | +            |
| – Past PA/exercise experience                                           |                      | 72                                |                                     | +            |
| – Being a university athlete                                            |                      |                                   | 137, 165                            | ?            |
| – Availability and/or engagement in enjoyable sports                    |                      | 115, 137                          |                                     | +            |
| – Loving watching sports                                                |                      |                                   | 115                                 | ?            |
| – Having a favourite athlete                                            |                      |                                   | 115                                 | ?            |
| – Spare time                                                            |                      | 49, 59, 82, 115                   |                                     | ++           |
| <i>Knowledge</i>                                                        |                      |                                   |                                     |              |
| – Knowledge about PA                                                    |                      | 44, 50 (M, F), 59, 117, 188, 194  | 49, 82, 87, 112, 159, 165, 195, 197 | ?            |
| <i>Academic/school performance</i>                                      |                      |                                   |                                     |              |
| – Grade point average                                                   |                      |                                   | 179                                 | ?            |
| <b>Social environment</b>                                               |                      |                                   |                                     |              |
| <i>Social and cultural factors</i>                                      |                      |                                   |                                     |              |
| – Social support                                                        |                      | 50 (M, F), 87, 159, 165, 194, 197 |                                     | ++           |
| – General interpersonal influences                                      | 151                  | 49, 82, 197                       | 117                                 | +            |
| – Parent/family influences                                              |                      | 81, 83, 137, 172                  | 72, 117                             | ++           |
| – Family members' involvement in PA/exercise                            |                      | 137                               |                                     | +            |
| – Friendship/companionship influences                                   |                      | 81                                |                                     | +            |
| – Friends' involvement in PA/exercise                                   |                      |                                   | 115                                 | ?            |
| – Information support (e.g. from media)                                 |                      | 49, 159, 194, 197                 | 82                                  | ++           |

| Correlates                                                                          | Relationship with PA |              |                     | Summary |
|-------------------------------------------------------------------------------------|----------------------|--------------|---------------------|---------|
|                                                                                     | Negative/Inverse (-) | Positive (+) | Non-significant (?) | Code    |
| – Religion (+ denotes Buddhists are more active, - denotes Muslims are more active) |                      |              | 95                  | ?       |
| <b>Physical environment</b>                                                         |                      |              |                     |         |
| <i>Environment factors</i>                                                          |                      |              |                     |         |
| – Environmental support (e.g. situational influences)                               |                      | 137          | 72, 151, 195        | ?       |
| – Supportive physical environment (e.g. facilities, supplies)                       |                      | 81, 82, 87   | 49, 197             | +       |
| – Supportive neighbourhood environment                                              |                      |              | 81                  | ?       |
| – Urban environment                                                                 | 100 (M, F)           |              |                     | -       |
| – Convenience of travel                                                             |                      |              | 115                 | ?       |
| <b>Policy</b>                                                                       |                      |              |                     |         |
| <i>Policy attributes</i>                                                            |                      |              |                     |         |
| – Supportive education policies                                                     |                      | 82, 165      | 49                  | +       |
| – Supportive workplace policies                                                     |                      |              | 197                 | ?       |

(+) Mostly positive associations, (-) Mostly negative associations, (?) Mostly non-significant, indeterminate, or inconsistent associations, (M) Male, (F) Female, Faculty\* and Campus/working location\* variables - due to a number of categories of these variables, we used only + (to denote any significant association of specific faculties or campuses/working locations) and ? (to denote a non-significant association) codes.

Supplementary Table 10: Summary of evidence on occupation physical activity in Thai adults (18 – 59 years old)

| Correlates                   | Relationship with PA |              |                     | Summary Code |
|------------------------------|----------------------|--------------|---------------------|--------------|
|                              | Negative/Inverse (-) | Positive (+) | Non-significant (?) |              |
| Individual Level             |                      |              |                     |              |
| <i>Biological factors</i>    |                      |              |                     |              |
| - Bone mineral density (BMD) |                      | 160 (M)      | 160 (F), 160 (M, F) | ?            |
| - Calcaneal stiffness index  |                      |              | 160 (M, F)          | ?            |

(+) Mostly positive associations, (-) Mostly negative associations, (?) Mostly non-significant, indeterminate, or inconsistent associations, (M) Male, (F) Female

Supplementary Table 11: Summary of evidence on transportation physical activity in Thai adults (18 – 59 years old)

| Correlates                                                                                                         | Relationship with PA |              |                     | Summary |
|--------------------------------------------------------------------------------------------------------------------|----------------------|--------------|---------------------|---------|
|                                                                                                                    | Negative/Inverse (-) | Positive (+) | Non-significant (?) | Code    |
| <b>Individual Level</b>                                                                                            |                      |              |                     |         |
| <i>Demographic factors</i>                                                                                         |                      |              |                     |         |
| – Age                                                                                                              |                      | 58           |                     | +       |
| – Sex (+ denotes males are more active, - denotes females are more active)                                         |                      |              | 58                  | ?       |
| – Municipality (+ denotes more PA in an urban place of residence, - denotes more PA in a rural place of residence) |                      |              | 58                  | ?       |
| – Marital status (+ denotes singles are more active)                                                               |                      |              | 58                  | ?       |
| – Education level                                                                                                  | 58                   |              |                     | -       |
| – Household income                                                                                                 |                      |              | 58                  | ?       |
| – Occupation (+ denotes unemployed are more active)                                                                |                      |              | 58                  | ?       |
| <i>Biological factors</i>                                                                                          |                      |              |                     |         |
| – Body mass index (BMI)                                                                                            |                      |              | 58                  | ?       |
| – Bone mineral density (BMD)                                                                                       |                      | 160 (M)      | 160 (M, F)          | ?       |
| – Calcaneal stiffness index                                                                                        |                      |              | 160 (M, F)          | ?       |
| <i>Health behavioural and lifestyle</i>                                                                            |                      |              |                     |         |
| – Sedentary time                                                                                                   | 58                   |              |                     | -       |
| <b>Physical environment</b>                                                                                        |                      |              |                     |         |
| <i>Environment factors</i>                                                                                         |                      |              |                     |         |
| – Distance to work                                                                                                 |                      |              | 58                  | ?       |
| – Distance to the nearest shopping place                                                                           | 58                   |              |                     | -       |
| – Distance to the nearest religious establishment                                                                  |                      |              | 58                  | ?       |

(+) Mostly positive associations, (-) Mostly negative associations, (?) Mostly non-significant, indeterminate, or inconsistent associations, (M) Male, (F) Female

Supplementary Table 12: Summary of evidence on recreation physical activity in Thai adults (18 – 59 years old)

| Correlates                                                                                                         | Relationship with PA |              |                     | Summary |
|--------------------------------------------------------------------------------------------------------------------|----------------------|--------------|---------------------|---------|
|                                                                                                                    | Negative/Inverse (-) | Positive (+) | Non-significant (?) | Code    |
| <b>Individual Level</b>                                                                                            |                      |              |                     |         |
| <i>Demographic factors</i>                                                                                         |                      |              |                     |         |
| – Age                                                                                                              |                      |              | 58                  | ?       |
| – Sex (+ denotes males are more active, - denotes females are more active)                                         |                      |              | 58                  | ?       |
| – Municipality (+ denotes more PA in an urban place of residence, - denotes more PA in a rural place of residence) | 58                   |              |                     | -       |
| – Marital status (+ denotes singles are more active)                                                               |                      |              | 58                  | ?       |
| – Education level                                                                                                  |                      |              | 58                  | ?       |
| – Household income                                                                                                 |                      | 58           |                     | +       |
| – Occupation (+ denotes unemployed are more active)                                                                |                      |              | 58                  | ?       |
| <i>Biological factors</i>                                                                                          |                      |              |                     |         |
| – Body mass index (BMI)                                                                                            |                      |              | 58                  | ?       |
| – Bone mineral density (BMD)                                                                                       |                      | 160 (M, F)   |                     | +       |
| – Calcaneal stiffness index                                                                                        |                      | 160 (M, F)   |                     | +       |
| – Hypercholesterolemia                                                                                             |                      |              | 103 (M, F)          | ?       |
| <i>Psychological, cognitive, and emotional factors</i>                                                             |                      |              |                     |         |
| – Self-efficacy                                                                                                    |                      | 187          |                     | +       |
| – Perceived benefits of PA/exercise                                                                                |                      |              | 187                 | ?       |
| – Perceived barriers for PA/exercise                                                                               |                      |              | 187                 | ?       |
| <i>Health behavioural and lifestyle</i>                                                                            |                      |              |                     |         |
| – Sedentary time                                                                                                   | 58                   |              |                     | -       |
| <b>Social environment</b>                                                                                          |                      |              |                     |         |
| <i>Social and cultural factors</i>                                                                                 |                      |              |                     |         |
| – General interpersonal influences                                                                                 |                      | 187          |                     | +       |
| <b>Physical environment</b>                                                                                        |                      |              |                     |         |
| <i>Environment factors</i>                                                                                         |                      |              |                     |         |

| Correlates                                    | Relationship with PA |              |                     | Summary |
|-----------------------------------------------|----------------------|--------------|---------------------|---------|
|                                               | Negative/Inverse (-) | Positive (+) | Non-significant (?) | Code    |
| - Distance to the nearest recreation facility |                      |              | 58                  | ?       |

(+) Mostly positive associations, (-) Mostly negative associations, (?) Mostly non-significant, indeterminate, or inconsistent associations, (M) Male, (F) Female

Supplementary Table 13: Summary of evidence on domestic physical activity in Thai adults (18 – 59 years old)

| Correlates                                                                 | Relationship with PA |              |                     | Summary |
|----------------------------------------------------------------------------|----------------------|--------------|---------------------|---------|
|                                                                            | Negative/Inverse (-) | Positive (+) | Non-significant (?) | Code    |
| <b>Individual Level</b>                                                    |                      |              |                     |         |
| <i>Demographic factors</i>                                                 |                      |              |                     |         |
| – Sex (+ denotes males are more active, - denotes females are more active) | 100                  |              |                     | -       |
| <i>Biological factors</i>                                                  |                      |              |                     |         |
| – Obesity                                                                  | 46 (M, F), 47 (M, F) |              |                     | --      |
| <b>Physical environment</b>                                                |                      |              |                     |         |
| <i>Environment factors</i>                                                 |                      |              |                     |         |
| – Urban environment                                                        | 100 (M, F)           |              |                     | -       |

(+) Mostly positive associations, (-) Mostly negative associations, (?) Mostly non-significant, indeterminate, or inconsistent associations, (M) Male, (F) Female

Supplementary Table 14: Summary of evidence on moderate-to-vigorous physical activity (MVPA) in Thai older adults (60 years old and above)

| Correlates                                                                 | Relationship with PA |              |                     | Summary Code |
|----------------------------------------------------------------------------|----------------------|--------------|---------------------|--------------|
|                                                                            | Negative/Inverse (-) | Positive (+) | Non-significant (?) |              |
| <b>Individual Level</b>                                                    |                      |              |                     |              |
| <i>Demographic factors</i>                                                 |                      |              |                     |              |
| - Age                                                                      | 104                  |              | 66, 116, 142        | ?            |
| - Sex (+ denotes males are more active, - denotes females are more active) | 66                   | 31, 116, 142 |                     | +            |
| - Marital status (+ denotes singles are more active)                       |                      | 66           |                     | +            |
| - Education level                                                          | 116                  | 142          | 66                  | ?            |
| - Household income                                                         | 66                   |              | 142                 | ?            |
| - Senior-citizen club membership (+ denotes yes, - denotes no)             |                      |              | 66                  | ?            |
| <i>Biological factors</i>                                                  |                      |              |                     |              |
| - Body mass index (BMI)                                                    |                      |              | 66                  | ?            |
| - Overweight                                                               |                      |              | 146 (M, F)          | ?            |
| - Total cholesterol (TCH) level                                            |                      |              | 60 (M, F)           | ?            |
| - Triglyceride (TG) level                                                  | 60 (M, F)            |              |                     | -            |
| - HDL-Cholesterol level                                                    |                      | 60 (M, F)    |                     | +            |
| - Total cholesterol: HDL-C ratio                                           | 60 (M, F)            |              |                     | -            |
| - High TCH                                                                 |                      |              | 60 (M, F)           | ?            |
| - High TG                                                                  | 60 (M, F)            |              |                     | -            |
| - Low HDL-C                                                                |                      |              | 60 (M, F)           | ?            |
| - High TCH: HDL-C ratio                                                    |                      |              | 60 (M, F)           | ?            |
| - Resting heart rate                                                       | 166 (M, F)           |              |                     | -            |
| - Mean heart rate                                                          |                      |              | 166 (M, F)          | ?            |
| - Predicted maximum heart rate (%)                                         |                      |              | 166 (M, F)          | ?            |
| - Systolic blood pressure                                                  |                      |              | 166 (M, F)          | ?            |
| - Diastolic blood pressure                                                 |                      |              | 166 (M, F)          | ?            |
| - VO <sub>2</sub> max                                                      |                      | 166 (M, F)   |                     | +            |



| Correlates                                                                                | Relationship with PA |              |                     | Summary |
|-------------------------------------------------------------------------------------------|----------------------|--------------|---------------------|---------|
|                                                                                           | Negative/Inverse (-) | Positive (+) | Non-significant (?) | Code    |
| - FEV1 (Abnormal lung function)                                                           |                      |              | 166 (M, F)          | ?       |
| - FVC (Pulmonary function test)                                                           |                      |              | 166 (M, F)          | ?       |
| - FEV1/FVC (%)                                                                            |                      |              | 166 (M, F)          | ?       |
| <i>Physical health</i>                                                                    |                      |              |                     |         |
| - History of sickness/Underlying illness/Co-morbid diseases (+ denotes yes, - denotes no) | 66                   |              |                     | -       |
| <i>Psychological, cognitive, and emotional factors</i>                                    |                      |              |                     |         |
| - Self-efficacy                                                                           |                      | 104          |                     | +       |
| - Outcome expectancies                                                                    |                      | 104          |                     | +       |
| <i>Physical skills, abilities, and fitness</i>                                            |                      |              |                     |         |
| - Physical and functional fitness (e.g. walking distance, leg strength)                   |                      | 166 (M, F)   |                     | +       |
| <i>Health behavioural and lifestyle</i>                                                   |                      |              |                     |         |
| - Smoking                                                                                 | 66                   |              | 78 (M, F), 153      | ?       |
| - Alcohol consumption                                                                     | 66                   |              |                     | -       |
| <b>Social environment</b>                                                                 |                      |              |                     |         |
| <i>Social and cultural factors</i>                                                        |                      |              |                     |         |
| - Parent/family influences                                                                |                      |              | 104                 | ?       |
| - Friendship/companionship influences                                                     |                      |              | 104                 | ?       |
| <b>Physical environment</b>                                                               |                      |              |                     |         |
| <i>Environment factors</i>                                                                |                      |              |                     |         |
| - Supportive neighbourhood environment                                                    |                      | 104          |                     | +       |

(+) Mostly positive associations, (-) Mostly negative associations, (?) Mostly non-significant, indeterminate, or inconsistent associations, (M) Male, (F) Female

Supplementary Table 15: Summary of evidence on total physical activity in Thai older adults (60 years old and above)

| Correlates                                                                 | Relationship with PA |              |                     | Summary Code |
|----------------------------------------------------------------------------|----------------------|--------------|---------------------|--------------|
|                                                                            | Negative/Inverse (-) | Positive (+) | Non-significant (?) |              |
| <b>Individual Level</b>                                                    |                      |              |                     |              |
| <i>Demographic factors</i>                                                 |                      |              |                     |              |
| - Age                                                                      | 139, 164             |              |                     | -            |
| - Sex (+ denotes males are more active, - denotes females are more active) |                      | 152          | 39, 68, 139, 164    | ??           |
| - Marital status (+ denotes singles are more active)                       |                      |              | 139, 164            | ?            |
| - Education level                                                          |                      | 40, 139, 164 | 39                  | +            |
| - Household income                                                         |                      | 39, 40, 139  |                     | +            |
| - Senior-citizen club membership (+ denotes yes, - denotes no)             |                      | 139          |                     | +            |
| <i>Biological factors</i>                                                  |                      |              |                     |              |
| - Bone mineral density (BMD)                                               |                      | 99, 138      |                     | +            |
| - Dietary calcium intake                                                   |                      | 138          |                     | +            |
| - Sunlight exposure                                                        |                      | 138          |                     | +            |
| <i>Physical health</i>                                                     |                      |              |                     |              |
| - Osteoporosis                                                             | 138                  |              |                     | -            |
| <i>General health</i>                                                      |                      |              |                     |              |
| - Self-rated general health                                                |                      | 98, 139, 164 |                     | +            |
| - Health-related quality of life                                           |                      | 56           |                     | +            |
| - General oral-health status (i.e. number of teeth, and oral malodour)     |                      |              | 152                 | ?            |
| - Periodontal disease                                                      | 152                  |              |                     | -            |
| - Saliva flow rate                                                         |                      | 152          |                     | +            |
| <i>Psychological, cognitive, and emotional factors</i>                     |                      |              |                     |              |
| - Mental health                                                            |                      | 98           |                     | +            |
| - Self-efficacy                                                            |                      | 98, 139      | 39, 53              | ?            |
| - Perceived benefits of PA/exercise                                        |                      | 40, 139      | 39                  | +            |
| - Perceived barriers for PA/exercise                                       | 39, 40, 139          |              |                     | -            |

| Correlates                                                                                                    | Relationship with PA |              |                     | Summary |
|---------------------------------------------------------------------------------------------------------------|----------------------|--------------|---------------------|---------|
|                                                                                                               | Negative/Inverse (-) | Positive (+) | Non-significant (?) | Code    |
| – Commitment to an exercise plan                                                                              |                      | 53           |                     | +       |
| <i>Health behavioural and lifestyle</i>                                                                       |                      |              |                     |         |
| – Oral health behaviours (i.e. tooth brushing, and regular dental visits)                                     |                      | 152          |                     | +       |
| Social environment                                                                                            |                      |              |                     |         |
| <i>Social and cultural factors</i>                                                                            |                      |              |                     |         |
| – Social support                                                                                              |                      | 53           | 98                  | ?       |
| – General interpersonal influences                                                                            |                      | 139          | 117                 | ?       |
| – Parent/family influences                                                                                    |                      |              | 39                  | ?       |
| – Information support (e.g. from media)                                                                       |                      | 164          |                     | +       |
| Physical environment                                                                                          |                      |              |                     |         |
| <i>Environment factors</i>                                                                                    |                      |              |                     |         |
| – Supportive physical environment (e.g. facilities, supplies)                                                 |                      | 39           |                     | +       |
| – Supportive neighbourhood environment                                                                        |                      | 39, 40       | 98                  | +       |
| – A sense of community                                                                                        |                      | 98           |                     | +       |
| – Residential community (+ denotes rural community is more active, - denotes residential home is more active) |                      | 78           |                     | +       |

(+) Mostly positive associations, (-) Mostly negative associations, (?) Mostly non-significant, indeterminate, or inconsistent associations, (M) Male, (F) Female

Supplementary Table 16: Summary of evidence on moderate physical activity (MPA) in Thai older adults (60 years old and above)

| Correlates                                                              | Relationship with PA |              |                     | Summary |
|-------------------------------------------------------------------------|----------------------|--------------|---------------------|---------|
|                                                                         | Negative/Inverse (-) | Positive (+) | Non-significant (?) | Code    |
| <b>Individual Level</b>                                                 |                      |              |                     |         |
| <i>Psychological, cognitive, and emotional factors</i>                  |                      |              |                     |         |
| – Mental health                                                         |                      |              | 43                  | ?       |
| <i>Physical skills, abilities, and fitness</i>                          |                      |              |                     |         |
| – Physical and functional fitness (e.g. walking distance, leg strength) |                      | 43           |                     | +       |

(+) Mostly positive associations, (-) Mostly negative associations, (?) Mostly non-significant, indeterminate, or inconsistent associations, (M) Male, (F) Female

Supplementary Table 17: Summary of evidence on vigorous physical activity (VPA) in Thai older adults (60 years old and above)

| Correlates                                                                          | Relationship with PA |              |                     | Summary Code |
|-------------------------------------------------------------------------------------|----------------------|--------------|---------------------|--------------|
|                                                                                     | Negative/Inverse (-) | Positive (+) | Non-significant (?) |              |
| <b>Individual Level</b>                                                             |                      |              |                     |              |
| <i>Demographic factors</i>                                                          |                      |              |                     |              |
| - Sex (+ denotes males are more active, - denotes females are more active)          |                      | 184          |                     | +            |
| <i>Psychological, cognitive, and emotional factors</i>                              |                      |              |                     |              |
| - Mental health                                                                     |                      | 43           |                     | +            |
| <i>Physical skills, abilities, and fitness</i>                                      |                      |              |                     |              |
| - Physical and functional fitness (e.g. walking distance, leg strength)             |                      | 43           |                     | +            |
| <b>Social environment</b>                                                           |                      |              |                     |              |
| <i>Social and cultural factors</i>                                                  |                      |              |                     |              |
| - Religion (+ denotes Buddhists are more active, - denotes Muslims are more active) |                      | 184          |                     | +            |

(+) Mostly positive associations, (-) Mostly negative associations, (?) Mostly non-significant, indeterminate, or inconsistent associations, (M) Male, (F) Female

Supplementary Table 18: Summary of evidence on transportation physical activity in Thai older adults (60 years old and above)

| Correlates                                                                                                         | Relationship with PA |              |                     | Summary Code |
|--------------------------------------------------------------------------------------------------------------------|----------------------|--------------|---------------------|--------------|
|                                                                                                                    | Negative/Inverse (-) | Positive (+) | Non-significant (?) |              |
| <b>Individual Level</b>                                                                                            |                      |              |                     |              |
| <i>Demographic factors</i>                                                                                         |                      |              |                     |              |
| - Age                                                                                                              |                      | 58           |                     | +            |
| - Sex (+ denotes males are more active, - denotes females are more active)                                         |                      |              | 58                  | ?            |
| - Municipality (+ denotes more PA in an urban place of residence, - denotes more PA in a rural place of residence) |                      |              | 58                  | ?            |
| - Marital status (+ denotes singles are more active)                                                               |                      |              | 58                  | ?            |
| - Education level                                                                                                  | 58                   |              |                     | -            |
| - Household income                                                                                                 |                      |              | 58                  | ?            |
| - Occupation (+ denotes unemployed are more active)                                                                |                      |              | 58                  | ?            |
| <i>Biological factors</i>                                                                                          |                      |              |                     |              |
| - Body mass index (BMI)                                                                                            |                      |              | 58                  | ?            |
| <i>Health behavioural and lifestyle</i>                                                                            |                      |              |                     |              |
| - Sedentary time                                                                                                   | 58                   |              |                     | -            |
| <b>Physical environment</b>                                                                                        |                      |              |                     |              |
| <i>Environment factors</i>                                                                                         |                      |              |                     |              |
| - Distance to work                                                                                                 |                      |              | 58                  | ?            |
| - Distance to the nearest shopping place                                                                           | 58                   |              |                     | -            |
| - Distance to the nearest religious establishment                                                                  |                      |              | 58                  | ?            |

(+) Mostly positive associations, (-) Mostly negative associations, (?) Mostly non-significant, indeterminate, or inconsistent associations, (M) Male, (F) Female

Supplementary Table 19: Summary of evidence on recreation physical activity in Thai older adults (60 years old and above)

| Correlates                                                                                                         | Relationship with PA |              |                     | Summary Code |
|--------------------------------------------------------------------------------------------------------------------|----------------------|--------------|---------------------|--------------|
|                                                                                                                    | Negative/Inverse (-) | Positive (+) | Non-significant (?) |              |
| <b>Individual Level</b>                                                                                            |                      |              |                     |              |
| <i>Demographic factors</i>                                                                                         |                      |              |                     |              |
| - Age                                                                                                              |                      |              | 58                  | ?            |
| - Sex (+ denotes males are more active, - denotes females are more active)                                         |                      |              | 58                  | ?            |
| - Municipality (+ denotes more PA in an urban place of residence, - denotes more PA in a rural place of residence) | 58                   |              |                     | -            |
| - Marital status (+ denotes singles are more active)                                                               |                      |              | 58                  | ?            |
| - Education level                                                                                                  |                      |              | 58                  | ?            |
| - Household income                                                                                                 |                      | 58           |                     | +            |
| - Occupation (+ denotes unemployed are more active)                                                                |                      |              | 58                  | ?            |
| <i>Biological factors</i>                                                                                          |                      |              |                     |              |
| - Body mass index (BMI)                                                                                            |                      |              | 58                  | ?            |
| - Hypercholesterolemia                                                                                             |                      |              | 103 (M, F)          | ?            |
| <i>General health</i>                                                                                              |                      |              |                     |              |
| - Health-related quality of life                                                                                   |                      | 48           |                     | +            |
| <i>Health behavioural and lifestyle</i>                                                                            |                      |              |                     |              |
| - Sedentary time                                                                                                   | 58                   |              |                     | -            |
| <b>Physical environment</b>                                                                                        |                      |              |                     |              |
| <i>Environment factors</i>                                                                                         |                      |              |                     |              |
| - Distance to the nearest recreation facility                                                                      |                      |              | 58                  | ?            |

(+) Mostly positive associations, (-) Mostly negative associations, (?) Mostly non-significant, indeterminate, or inconsistent associations, (M) Male, (F) Female

Supplementary Table 20: Summary of evidence on occupation physical activity in Thai older adults (60 years old and above)

| Correlates                       | Relationship with PA |              |                     | Summary |
|----------------------------------|----------------------|--------------|---------------------|---------|
|                                  | Negative/Inverse (-) | Positive (+) | Non-significant (?) | Code    |
| Individual Level                 |                      |              |                     |         |
| <i>General health</i>            |                      |              |                     |         |
| - Health-related quality of life |                      | 48           |                     | +       |

(+) Mostly positive associations, (-) Mostly negative associations, (?) Mostly non-significant, indeterminate, or inconsistent associations, (M) Male, (F) Female



Supplementary Table 21: Summary of evidence on domestic physical activity in Thai older adults (60 years old and above)

| Correlates                                                                 | Relationship with PA |              |                     | Summary |
|----------------------------------------------------------------------------|----------------------|--------------|---------------------|---------|
|                                                                            | Negative/Inverse (-) | Positive (+) | Non-significant (?) | Code    |
| <b>Individual Level</b>                                                    |                      |              |                     |         |
| <i>Demographic factors</i>                                                 |                      |              |                     |         |
| - Sex (+ denotes males are more active, - denotes females are more active) | 100                  |              |                     | -       |
| <i>Biological factors</i>                                                  |                      |              |                     |         |
| - Obesity                                                                  | 47 (M, F)            |              |                     | -       |
| <i>General health</i>                                                      |                      |              |                     |         |
| - Health-related quality of life                                           |                      | 48           |                     | +       |
| <b>Physical environment</b>                                                |                      |              |                     |         |
| <i>Environment factors</i>                                                 |                      |              |                     |         |
| - Urban environment                                                        | 100 (M, F)           |              |                     | -       |

(+) Mostly positive associations, (-) Mostly negative associations, (?) Mostly non-significant, indeterminate, or inconsistent associations, (M) Male, (F) Female

Supplementary Table 22: Summary of evidence on exercise in Thai older adults (60 years old and above)

| Correlates                                                                                                                                                           | Relationship with PA |                             |                              | Summary |
|----------------------------------------------------------------------------------------------------------------------------------------------------------------------|----------------------|-----------------------------|------------------------------|---------|
|                                                                                                                                                                      | Negative/Inverse (-) | Positive (+)                | Non-significant (?)          | Code    |
| <b>Individual Level</b>                                                                                                                                              |                      |                             |                              |         |
| <i>Demographic factors</i>                                                                                                                                           |                      |                             |                              |         |
| - Age                                                                                                                                                                | 191, 192             | 37, 59, 124, 140            | 117, 155, 162, 174, 176, 185 | ??      |
| - Sex (+ denotes males are more active, - denotes females are more active)                                                                                           | 155                  | 42, 100, 117, 162, 174, 185 | 59, 124, 140, 176, 191       | ??      |
| - Municipality (+ denotes more PA in an urban place of residence, - denotes more PA in a rural place of residence)                                                   |                      | 192                         |                              | +       |
| - Marital status (+ denotes singles are more active)                                                                                                                 |                      | 155                         | 59, 117, 174, 185, 191       | ??      |
| - Education level                                                                                                                                                    | 117                  | 59, 155, 162, 185, 192      | 174, 191                     | ++      |
| - Household income                                                                                                                                                   | 117                  | 185, 182                    | 59, 162                      | ?       |
| - Occupation (+ denotes unemployed are more active)                                                                                                                  |                      | 155                         | 59, 117                      | ?       |
| - Region (+ denotes Central including Bangkok residents are more active, - denotes residents of other provinces are more active)                                     | 134                  | 155                         |                              | ?       |
| - Daily duties (+ denotes individuals performing daily duties regularly are more active, - denotes individuals performing daily duties occasionally are more active) | 162                  |                             |                              | -       |
| - Senior-citizen club membership (+ denotes yes, - denotes no)                                                                                                       |                      | 191                         |                              | +       |
| - Duration of health club membership                                                                                                                                 |                      |                             | 117                          | ?       |
| - Ever attended a workshop on exercise (+ denotes yes, - denotes no)                                                                                                 |                      | 124                         |                              | +       |
| <i>Biological factors</i>                                                                                                                                            |                      |                             |                              |         |
| - Obesity                                                                                                                                                            | 47 (M, F)            |                             |                              | -       |
| - Bone mineral density (BMD)                                                                                                                                         | 42 (F)               | 134                         | 42 (M)                       | ?       |
| - Skeletal muscle mass (%)                                                                                                                                           |                      |                             | 143                          | ?       |
| - Adequate serum vitamin D levels                                                                                                                                    |                      |                             | 143                          | ?       |
| - Systolic blood pressure                                                                                                                                            | 161                  |                             |                              | -       |
| - Diastolic blood pressure                                                                                                                                           | 161                  |                             |                              | -       |

| Correlates                                                                                          | Relationship with PA |                   |                     | Summary |
|-----------------------------------------------------------------------------------------------------|----------------------|-------------------|---------------------|---------|
|                                                                                                     | Negative/Inverse (-) | Positive (+)      | Non-significant (?) | Code    |
| - Hematocrit level                                                                                  | 73                   |                   |                     | -       |
| - Hypercholesterolemia                                                                              |                      |                   | 103 (M, F)          | ?       |
| <i>Physical health</i>                                                                              |                      |                   |                     |         |
| - History of sickness/Underlying illness/Co-morbid diseases (+ denotes yes, - denotes no)           |                      |                   | 59, 162             | ?       |
| - Having health symptoms (i.e. fatigue, weight loss, sleep disorders) (+ denotes yes, - denotes no) | 162                  |                   |                     | -       |
| - Osteoporosis                                                                                      |                      |                   |                     |         |
| - Age-related macular degeneration (AMD)                                                            | 88                   |                   |                     | -       |
| <i>General health</i>                                                                               |                      |                   |                     |         |
| - Self-rated general health                                                                         |                      | 168, 175          | 185, 192            | ?       |
| - Health-related quality of life                                                                    |                      | 41                |                     | +       |
| <i>Psychological, cognitive, and emotional factors</i>                                              |                      |                   |                     |         |
| - Mental health                                                                                     |                      | 32, 175           |                     | +       |
| - Attitudes towards PA/exercise                                                                     |                      | 79, 117, 188, 191 |                     | ++      |
| - Self-efficacy                                                                                     |                      | 79, 140, 162, 185 | 174                 | ++      |
| - Perceived benefits of PA/exercise                                                                 |                      | 79, 174, 176, 192 | 59                  | ++      |
| - Perceived barriers for PA/exercise                                                                | 79, 176              |                   | 174                 | -       |
| - Outcome expectancies                                                                              |                      | 79, 140, 162      |                     | +       |
| - Intension to PA/exercise                                                                          |                      | 79, 140           |                     | +       |
| - Perceived control                                                                                 |                      | 79                |                     | +       |
| - Subjective norms                                                                                  |                      | 79                |                     | +       |
| - Enjoyment of PA/exercise                                                                          |                      | 59                |                     | +       |
| - Perceived health risks of exercise                                                                | 140                  |                   |                     | -       |
| - Life satisfaction                                                                                 |                      | 120               |                     | +       |
| - Career satisfaction                                                                               |                      | 182               |                     | +       |
| - Motivation for PA/exercise                                                                        |                      |                   | 174                 | ?       |

| Correlates                                                                          | Relationship with PA |                   |                     | Summary |
|-------------------------------------------------------------------------------------|----------------------|-------------------|---------------------|---------|
|                                                                                     | Negative/Inverse (-) | Positive (+)      | Non-significant (?) | Code    |
| – Score on memory and intelligence tests                                            |                      |                   | 32                  | ?       |
| <i>Physical skills, abilities, and fitness</i>                                      |                      |                   |                     |         |
| – Ability to do daily activities                                                    |                      | 192               |                     | +       |
| – Physical and functional fitness (e.g. walking distance, leg strength)             |                      | 34, 93            |                     | +       |
| – Score on Timed Up and Go test                                                     | 93                   |                   |                     | -       |
| <i>Health behavioural and lifestyle</i>                                             |                      |                   |                     |         |
| – Alcohol consumption                                                               |                      | 177 (M)           | 177 (F)             | ?       |
| – Spare time                                                                        |                      | 59                |                     | +       |
| <i>Knowledge</i>                                                                    |                      |                   |                     |         |
| – Knowledge about PA/exercise                                                       |                      | 59, 117, 188, 191 | 162                 | ++      |
| <b>Social environment</b>                                                           |                      |                   |                     |         |
| <i>Social and cultural factors</i>                                                  |                      |                   |                     |         |
| – Social support                                                                    |                      | 192               | 162, 174            | ?       |
| – General interpersonal influences                                                  |                      |                   | 117                 | ?       |
| – Parent/family influences                                                          |                      | 191, 192          |                     | +       |
| – Friendship/companionship influences                                               |                      | 191, 192          |                     | +       |
| – Hospital staff support                                                            |                      | 191               |                     | +       |
| – Information support (e.g. from media)                                             |                      |                   |                     |         |
| – Religion (+ denotes Buddhists are more active, - denotes Muslims are more active) |                      | 192               |                     | +       |
| <b>Physical environment</b>                                                         |                      |                   |                     |         |
| <i>Environment factors</i>                                                          |                      |                   |                     |         |
| – Supportive physical environment (e.g. facilities, supplies)                       |                      | 192               | 117                 | ?       |
| – Urban environment                                                                 | 100 (M, F)           |                   |                     | -       |

(+) Mostly positive associations, (-) Mostly negative associations, (?) Mostly non-significant, indeterminate, or inconsistent associations, (M) Male, (F) Female
